# Supplementary material
Source: PubMed Central journal article supplement (PMC6783366)
Supplement: NIHMS1537573-supplement-1.pdf [file NIHMS1537573-supplement-1.pdf]

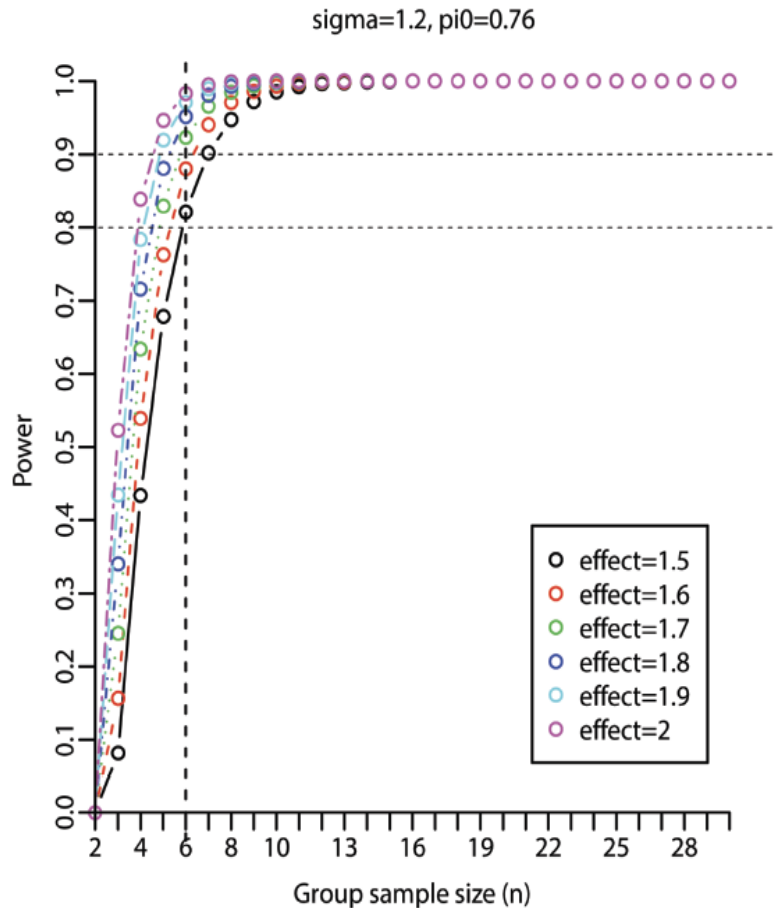

### Supplemental Figure 1: Scree plot of power analyses and sample size calculations.

The figure displays the predictive power of various sample sizes based on the variability of the data ( $\sigma$ ) and the treatment effect size. As indicated, the samples size of our smallest study group,  $n=6$ , is associated with an 80-98% power of detecting a fold-change ( $F_c$ ) effect in the 1.5-2.0 range.

Calculations are based on a Completely Randomized Design with Repeated Measures of a single Treatment Factor (Uninfected /*Mtb* infection of unsorted BAL cells /*Mtb* infection of CD4-depleted) on independent Experimental Units (subject-specific cell cultures). The *a priori* power analysis was based on calculation of the group sample size  $n$  required to detect a minimum effect in the Treatment Factor as a function of power, while controlling for an appropriate error rate that is consistent with the large number of simultaneous inferences associated with this type of high-dimensional dataset. This type of data requires application of methodology that gives a sample size that would control the False Discovery Rate (denoted FDR or  $\alpha$ ) [30] and simultaneously guarantee a certain power (denoted  $1-\beta$ ). We utilized methodology described in Liu, et al [31] with a less conservative extension of the FDR called positive FDR (denoted *pFDR*) [34-35]. After variance stabilization and normalization of the data [34-35], the usual distributional assumptions of test statistics become applicable [31]. Calculations utilized the experimental group sample size  $n$ , and the common standard deviation of all variables (i.e. genes) by  $\sigma$  and the effect size by  $\Delta/\sigma$ . We calculated the group sample size  $n$  required to detect e.g a minimum fold change  $F_c$  (effect size  $\Delta/\sigma = \log_2(F_c)/\sigma$ ) in the treatment factor effect as a function of power  $1-\beta$ , the parameter  $\pi_0$  (interpreted as the probability of non-differentially expressed variables), the common standard deviation  $\sigma$ , and a fixed level  $\alpha$  of *pFDR*. Using Bayes Rule, for any estimate of  $\pi_0$  and  $\alpha$  level of *pFDR* that we wish to control, we find the rejection region and the corresponding critical values for each sample size  $n$  [31]. Based on a pilot study in our hands, estimates of the parameters  $\pi_0$  and of the common standard deviation  $\sigma$  of the variables across experiments were  $\pi_0 = 0.41-0.98$  and  $\sigma = 0.72-1.19$ , which is consistent with estimates found in other platforms in high-dimensional data [31]. Under the above assumption and most conservative estimations (for fixed  $\pi_0 = 0.98$  and  $\sigma = 1.19$ ), while controlling the *FDR* at 5% ( $FDR \leq 0.05$ ), a group sample size of  $n \geq 6$  can detect a Fold-Change effect within the  $1.5 \leq F_c \leq 2.0$  range, with at least 80% power, as illustrated..

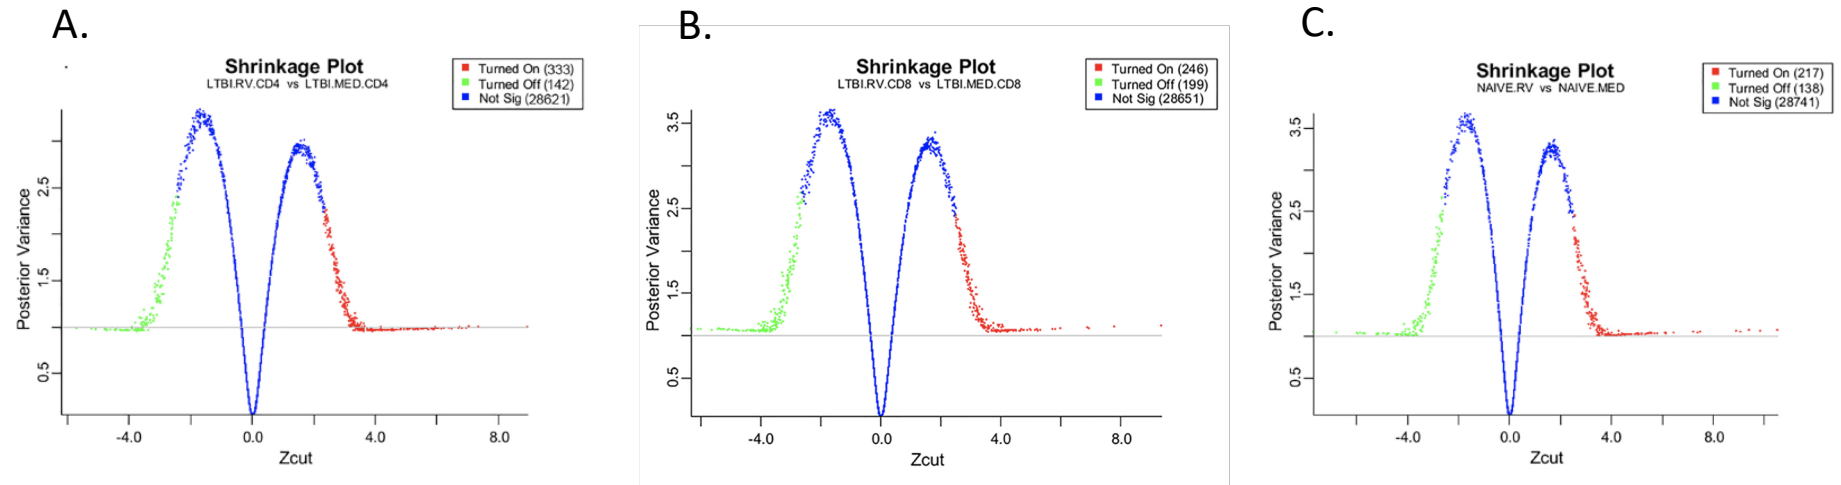

**Supplemental Figure 2: Shrinkage plots of differential *Mtb*-induced BAL cells gene expression.**

The determination of differentially-expressed genes in unsorted BAL cells from LTBI subjects in the CD4-depletion and CD8-depletion studies (A and B) and in *Mtb*-naïve subjects (C) are represented. Differential expression was determined after initial preprocessing using implementations and algorithms (including our own) available from the R project, which is an open-access programming language and platform for statistical computing and visualization of the Comprehensive R Archive Network (CRAN) consortium (<http://cran.r-project.org/>). A single pre-filtering was performed on the initial 33,297 features of the Affymetrix Human Genome U133 plus 2.0 arrays: After filtering the 4,201 Affymetrix control probesets out, the dataset was left with 29,096 mRNA probesets. There were no missing values. The dataset of measured intensities was corrected for global normalization, variance-stabilization and normality using our recently developed ‘*Joint Adaptive Mean-Variance Regularization*’ procedure as previously described [34–35] on the variables (genes or mRNA probesets). The entire procedure, including plot-generating functions, are implemented in our R package ‘MVR’ [36].

Analysis of differential expression of our variables (genes or mRNA probesets) between contrasts of interest was assessed in the context variable selection in a regression setting using our recent Bayesian hierarchical model and termed “Bayesian ANOVA”. The Bayesian hierarchical model produces so-called Spike & Slab shrunken regression estimates [38–40], that are advantageous in that they allow to build a parsimonious model. These estimates work by borrowing information across variables in a way that optimally balances false positive and false negative detection rates, and hence minimize the total misclassification errors. This approach eliminates the huge problem of specifying an arbitrarily *FDR* cutoff value of significance, and the drawback of excessive conservativeness [41]. In addition, it does not ignore the correlation structure or dependency between the variables, which is very frequently present within large datasets of observational data. Finally, minimal assumptions about the data are made, which makes this approach applicable to a wide range of settings. Overall, this methodology has practical and important applications in high-dimensional, noisy and correlated data, as often occur with “omics” datasets. It is currently implemented as a R package ‘spikeslab’, and as a stand-alone Java-based software, freely available to academic users: Bayesian Analysis of Microarray (BAM) ([www.bamarray.com](http://www.bamarray.com)) [42]. Our further analysis was based on an absolute *Z*-cut value of 2.5 for each data set.

## Supplemental Table II:

Functions of genes comprising the signature of the role of CD4+ T cells in BAL cell recall responses to *Mtb* in healthy LTBI subjects

| Symbol  | Entrez Gene Name                                                   | Function                                                                                                                                                                                                                  |
|---------|--------------------------------------------------------------------|---------------------------------------------------------------------------------------------------------------------------------------------------------------------------------------------------------------------------|
| AICDA   | activation induced cytidine deaminase                              | Creates mutations in DNA, master regulator of secondary antibody diversification                                                                                                                                          |
| CCL5    | C-C motif chemokine ligand 5 (aka RANTES)                          | Chemotactic to T cells, eosinophils and basophils                                                                                                                                                                         |
| CD226   | CD226 molecule (aka PTA1, DNAM-1)                                  | Mediates cellular adhesion via ligands CD112 and CD155                                                                                                                                                                    |
| CD274   | CD274 molecule (aka PD-L1, B7H1)                                   | Expressed on APCs, binds to T-cell PD-1 inhibiting T-cell proliferation and reducing apoptosis of Treg                                                                                                                    |
| CD40    | CD40 molecule                                                      | Expressed on APCs, provides for co-stimulation of CD4 cells via binding to CD154 (CD40L), also increases IFN $\gamma$ -induced phagocyte activation                                                                       |
| CD80    | CD80 molecule 9aka B7-1)                                           | Expressed on APCs, provides T-cell co-stimulation by binding to CD28 or CTLA-4                                                                                                                                            |
| CSF2RB  | colony stimulating factor 2 receptor beta common subunit           | Common subunit to type 1 cytokine receptors GM-CSF receptor, IL-3R, IL-5R                                                                                                                                                 |
| CXCL10  | C-X-C motif chemokine ligand 10 (aka IP-10)                        | Interferon-inducible, chemotactic to monocytes/macrophages, T cells, NK cells, dendritic cells                                                                                                                            |
| CXCL11  | C-X-C motif chemokine ligand 11 (aka I-TAC)                        | Induced strongly by IFN $\gamma$ and IFN $\beta$ , weakly by IFN $\alpha$ , higher affinity for CXCR3 than CXCL9 or CXCL10, chemotactic for activated T cells                                                             |
| CXCL9   | C-X-C motif chemokine ligand 9 (aka MIG)                           | Induced by IFN $\gamma$ , chemotactic via CXCR3                                                                                                                                                                           |
| DNAJC7  | DnaJ heat shock protein family (Hsp40) member C7                   | Interacts with checkpoint protein RAD9A                                                                                                                                                                                   |
| FAS     | Fas cell surface death receptor (aka CD95, APO-1)                  | Mediates apoptosis                                                                                                                                                                                                        |
| GZMB    | granzyme B                                                         | Serine protease within cytotoxic granules of NK cells and cytotoxic T cells                                                                                                                                               |
| HLA-F   | major histocompatibility complex, class I, F                       | Expressed on activated memory T cells, signals Treg to initiate production of inhibitory cytokines, serves a chaperone bringing HLA Class I to cell surface, ligand for KIR                                               |
| ICOS    | inducible T cell costimulator (aka CD278)                          | Expressed on activated T cells, suggested to be more important for Th2 than Th1 activation                                                                                                                                |
| IFI35   | interferon induced protein 35                                      | Interacts with N-myc interactor (NMI) which augments STAT mediated transcription responses to IL-2 and IFN $\gamma$ , also with Basic leucine zipper transcription factor, ATF-like (BATF) associated with Th17 responses |
| IFIT3   | interferon induced protein with tetratricopeptide repeats 3        | Role in host antiviral response by modulating immune signaling and apoptosis                                                                                                                                              |
| IFITM3  | interferon induced transmembrane protein 3                         | Important role in immunity to H1N1 influenza ("swine flu")                                                                                                                                                                |
| IFNG    | interferon gamma                                                   | Numerous activities in macrophage activation, antiviral response, immunoregulation, anti-tumor responses                                                                                                                  |
| IL10RA  | interleukin 10 receptor subunit alpha                              | Mediates immunosuppressive signal of IL-10                                                                                                                                                                                |
| IL15    | interleukin 15                                                     | Structural similarity to IL-2, secreted by mononuclear phagocytes in response to viral infection, induces proliferation of NK cells                                                                                       |
| IL15RA  | interleukin 15 receptor subunit alpha (aka CD122)                  | High affinity binding of IL-15, enhances cell proliferation, increases expression of apoptosis inhibitor BCL2/BCL2-XL and BCL2, also a component of IL-2R                                                                 |
| IL27    | interleukin 27                                                     | Member of IL-12 family, expressed by APCs, via IL-27R activates JAK-STAT and p38 MAPK pathways for inflammatory or anti-inflammatory effect                                                                               |
| IRF1    | interferon regulatory factor 1                                     | Transcription factor, regulates expression of target genes by binding interferon stimulated response element (ISRE), role in TLR antiviral responses and provides link between TLR9 and IFN $\gamma$ responses            |
| JAK2    | Janus kinase 2                                                     | Non-receptor tyrosine kinase, involved in signaling of IFN receptors as well as GM-CSF receptor family                                                                                                                    |
| KL      | klotho                                                             | Roles in sensitivity to insulin, protection from arteriosclerosis and aging                                                                                                                                               |
| LTA     | lymphotoxin alpha (aka TNF- $\beta$ )                              | Varying roles in membrane-bound vs soluble form, can support cell proliferation, differentiation, and apoptosis--important in development of Peyer's patches                                                              |
| MAP2K1  | mitogen-activated protein kinase kinase 1 (aka MEK1)               | Integration point for multiple biologic signals mediating cellular proliferation, differentiation, and transcriptional regulation                                                                                         |
| MX1     | MX dynamin like GTPase 1 (aka IFN-induced GTP binding protein Mx1) | Antiviral state specifically against influenza virus                                                                                                                                                                      |
| NECTIN2 | nectin cell adhesion molecule 2 (aka PVRL2, CD112)                 | Component of adherens junctions, serves as entry point for certain mutant strains of HSV and pseudorabies virus                                                                                                           |
| NLRCS   | NLR family CARD domain containing 5                                | PRR implicated in innate immunity to viruses, potentially by regulating IFN activity, may increase MHC expression                                                                                                         |
| PARP14  | poly(ADP-ribose) polymerase family member 14                       | Control of antimicrobial responses via impact on accumulation of multiple IFN-stimulated genes to the nucleus                                                                                                             |
| PARP9   | poly(ADP-ribose) polymerase family member 9                        | Facilitates STAT1 phosphorylation in M1 phagocytes                                                                                                                                                                        |
| PNPLA3  | patatin like phospholipase domain containing 3                     | Triacylglycerol lipase and acylglycerol-O-transferase activities; involved in triacylglycerol hydrolysis in adipocytes, possible role in energy metabolism                                                                |
| PSMB8   | proteasome subunit beta 8                                          | Contributes to assembly to the 20S proteasome complex forming proteolytic chamber for substrate degradation                                                                                                               |
| PSMB9   | proteasome subunit beta 9                                          | Contributes to assembly to the 20S proteasome complex forming proteolytic chamber for substrate degradation                                                                                                               |
| PSME1   | proteasome activator subunit 1                                     | Component of the 26S proteasome, cleave peptides in ATP/ubiquitin dependent, non-lysosomal pathway; modified "immunoproteasome" processes class I MHC peptides                                                            |
| PSME2   | proteasome activator subunit 2                                     | Component of the 26S proteasome, cleave peptides in ATP/ubiquitin dependent, non-lysosomal pathway; modified "immunoproteasome" processes class I MHC peptides                                                            |
| RARRS3  | retinoic acid receptor responder 3                                 | Nuclear receptor protein of steroid/thyroid hormone receptor family of transcriptional regulators                                                                                                                         |
| RFXS    | regulatory factor X5                                               | A nuclear protein complex that binds to X-box of MHC-II promoters                                                                                                                                                         |
| SOC32   | suppressor of cytokine signaling 2                                 | Inducible by EPO, GM-CSF, IL10 and IFN $\gamma$ , negative regulator of cytokine signaling, also interactions with insulin-like growth factor 1 receptor                                                                  |
| STAT2   | signal transducer and activator of transcription 2                 | In response to IFN, forms complex with STAT1 and IRF9 to act as transactivator                                                                                                                                            |
| TAP1    | transporter 1, ATP binding cassette subfamily B member             | Role in transport of intracellular peptide antigens to ER to facilitate MMHC Class I antigen presentation                                                                                                                 |
| TAP2    | transporter 2, ATP binding cassette subfamily B member             | Role in transport of intracellular peptide antigens to ER to facilitate MMHC Class I antigen presentation                                                                                                                 |
| TNFSF10 | TNF superfamily member 10 (aka TRAIL, CD253)                       | Cytokine that promotes apoptosis (particularly of tumor cells) by binding to specific death receptors                                                                                                                     |
| UBD     | ubiquitin D                                                        | Through covalent bonding targets other proteins for 26S degradation; implicated in caspase-dependent apoptosis, mitotic regulation, and dendritic cell maturation                                                         |
| USP53   | ubiquitin specific peptidase 53                                    | Classified as deubiquinating enzyme based on structure but likely catalytically inactive                                                                                                                                  |

Functions of genes comprising the signature of the role of CD4+ T-cells in BAL cell recall responses to *Mtb* in healthy LTBI subjects

\*highlighting = 9/47 genes (19%) involved in antiviral/anti-influenza response
